# Supplementary material for: Multi-pollutant emissions from the burning of major agricultural residues in China and the related health-economic effects
Source: Copernicus journal article supplement (doi:10.5194/acp-17-4957-2017), 2017-04-18
Supplement: Supplementary file 1 [file acp-17-4957-2017-supplement.zip]

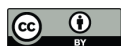

## *Supplement of*

# **Multi-pollutant emissions from the burning of major agricultural residues in China and the related health-economic effects**

**Chunlin Li et al.**

*Correspondence to:* Jianmin Chen (jmchen@fudan.edu.cn)

- [acp-17-4957-2017-supplement-title-page.pdf](#)
- [acp-2016-651 supporting information 2017-03-14 edition.docx](#)
- [supplementary material for detailed emission inventories based on 6 versions.xlsx](#)

The copyright of individual parts of the supplement might differ from the CC-BY 3.0 licence.
